# Supplementary material for: Characterization of acidic lysine acylations in mycobacteria
Source: Front Microbiol. 2024 Dec 10;15:1503184. doi: 10.3389/fmicb.2024.1503184 (PMC11667787; doi:10.3389/fmicb.2024.1503184)
Supplement: Supplementary file 4 [file Table_4.xlsx]

## Sheet: malonylation
Table S4A. The modified lysine sites and ratio per protein in malonylome
Protein	malonylated lysine sites in protein	malonylated lysine sites / all lysine sites in protein
A0R2D5	1	1
A0QV71	1	1
A0QWV8	2	1
A0R0S0	1	1
A0R2Q0	2	1
A0R5N9	1	1
A0R5H1	5	0.833333
A0QSU4	6	0.75
A0R2J4	3	0.75
A0QWS8	8	0.727273
A0QSG3	5	0.714286
A0QQU5	27	0.675
A0QVQ3	4	0.666667
A0QR00	10	0.666667
A0QY30	2	0.666667
A0QZ83	6	0.666667
A0R0Z8	2	0.666667
A0QVE0	9	0.642857
A0QUV6	12	0.631579
A0QXZ5	3	0.6
A0R462	3	0.6
A0R006	4	0.571429
P71534	4	0.571429
A0QVB9	13	0.541667
A0QSD0	4	0.5
O85501	3	0.5
A0QP38	2	0.5
A0QS41	3	0.5
A0QSR9	1	0.5
A0QTA0	1	0.5
A0QTD8	2	0.5
A0QU07	4	0.5
A0QV15	1	0.5
A0QWS9	1	0.5
A0QWV1	1	0.5
A0QZ29	1	0.5
A0QZY3	1	0.5
A0R0I8	2	0.5
A0R0S8	1	0.5
A0R100	1	0.5
A0R110	1	0.5
A0R188	1	0.5
A0R2I1	2	0.5
A0R2L2	1	0.5
A0R358	1	0.5
A0R3B6	1	0.5
A0R5F8	1	0.5
A0R7H4	1	0.5
A0QSJ2	9	0.473684
A0R221	6	0.461538
A0QWW2	11	0.458333
A0R652	5	0.454545
A0QPE6	5	0.454545
A0QSG1	4	0.444444
A0R2H8	7	0.4375
A0QQW8	13	0.433333
A0QQC8	18	0.428571
A0QS98	9	0.428571
A0QNF6	3	0.428571
A0QS63	6	0.428571
A0QTP1	3	0.428571
A0R417	9	0.428571
A0R656	3	0.428571
A0R724	3	0.428571
A0R729	3	0.428571
A0QND6	5	0.416667
A0QZB3	5	0.416667
A0QUX8	9	0.409091
A0QNF5	2	0.4
A0QSL8	6	0.4
A0R0B3	2	0.4
A0QRN7	4	0.4
A0R2Y1	6	0.4
A0R3Q0	4	0.4
A0R4K9	2	0.4
A0R7G8	2	0.4
A0QXA3	7	0.388889
A0R5M3	7	0.388889
A0R067	5	0.384615
A0R429	5	0.384615
A0QSS3	3	0.375
A0R203	6	0.375
Q50441	3	0.375
A0QV51	9	0.375
A0R0B0	10	0.37037
A0QWX9	7	0.368421
A0QYH7	4	0.363636
A0QSG0	5	0.357143
A0QSZ3	20	0.338983
A0QSD9	1	0.333333
A0QZX2	2	0.333333
A0R015	2	0.333333
A0R048	2	0.333333
A0R1Y7	6	0.333333
A0R3D7	1	0.333333
A0R7F9	2	0.333333
Q9AFI5	2	0.333333
Q9X5M0	5	0.333333
A0QNQ5	1	0.333333
A0QPL6	1	0.333333
A0QPN5	1	0.333333
A0QQF9	2	0.333333
A0QQP7	1	0.333333
A0QSX4	4	0.333333
A0QTJ6	1	0.333333
A0QU52	3	0.333333
A0QU64	1	0.333333
A0QUV7	5	0.333333
A0QUY2	6	0.333333
A0QV36	1	0.333333
A0QVQ2	2	0.333333
A0QW04	1	0.333333
A0QW32	1	0.333333
A0QWP3	1	0.333333
A0QWS0	2	0.333333
A0QWX6	2	0.333333
A0QX24	4	0.333333
A0QYP5	1	0.333333
A0QZY1	1	0.333333
A0R031	1	0.333333
A0R177	2	0.333333
A0R1X3	1	0.333333
A0R268	1	0.333333
A0R2E3	1	0.333333
A0R2V1	1	0.333333
A0R2V4	1	0.333333
A0R3D2	2	0.333333
A0R3P7	1	0.333333
A0R409	1	0.333333
A0R452	1	0.333333
A0R469	1	0.333333
A0R478	3	0.333333
A0R4D5	1	0.333333
A0R5B1	1	0.333333
A0R5V9	2	0.333333
A0R6R0	1	0.333333
A0QVQ5	12	0.324324
A0QUX1	6	0.315789
A0QSK9	6	0.315789
A0R2B1	18	0.310345
A0QTE1	9	0.310345
A0QNZ3	4	0.307692
A0R079	7	0.304348
A0R3M3	7	0.304348
A0QSH8	3	0.3
A0QSY5	3	0.3
A0QWR4	3	0.3
A0R066	3	0.3
A0R597	3	0.3
A0QQJ4	5	0.294118
A0QUY7	5	0.294118
A0QVQ8	5	0.294118
A0QPE8	5	0.294118
A0QS39	2	0.285714
A0QX95	2	0.285714
A0R024	2	0.285714
A0QPW2	2	0.285714
A0QQ62	2	0.285714
A0QR90	2	0.285714
A0QRI9	2	0.285714
A0QSK7	4	0.285714
A0QT96	2	0.285714
A0QUY3	2	0.285714
A0QX35	4	0.285714
A0QYF7	6	0.285714
A0QZ99	2	0.285714
A0R1Y5	2	0.285714
A0R2X3	2	0.285714
A0R629	4	0.285714
A0QRM0	5	0.277778
A0QVB8	5	0.277778
A0QY23	5	0.277778
A0QS97	3	0.272727
A0QSL7	3	0.272727
A0QVR3	3	0.272727
A0R0B2	3	0.272727
A0R102	3	0.272727
A0R2G5	3	0.272727
A0QQY0	4	0.266667
A0QW03	4	0.266667
A0QTE7	6	0.26087
A0QWY0	6	0.26087
A0QRN6	1	0.25
A0QSL4	1	0.25
A0QSQ1	1	0.25
A0QWG8	3	0.25
A0QWT2	3	0.25
A0QZZ6	1	0.25
A0R2G4	1	0.25
A0R3N5	1	0.25
A0R528	2	0.25
A0R5E1	1	0.25
A0R7F6	3	0.25
A0QP20	1	0.25
A0QPE7	4	0.25
A0QPJ0	1	0.25
A0QPV3	1	0.25
A0QQK8	1	0.25
A0QQS7	2	0.25
A0QQT1	1	0.25
A0QR04	2	0.25
A0QR65	1	0.25
A0QSB1	3	0.25
A0QSU0	1	0.25
A0QTG8	2	0.25
A0QTL8	1	0.25
A0QTX2	3	0.25
A0QUM7	5	0.25
A0QVM4	3	0.25
A0QWW4	3	0.25
A0QX16	1	0.25
A0QX36	6	0.25
A0QX84	1	0.25
A0QXC6	1	0.25
A0QXP9	1	0.25
A0QZ33	1	0.25
A0QZ96	2	0.25
A0R088	2	0.25
A0R0A8	2	0.25
A0R0C8	1	0.25
A0R0R1	1	0.25
A0R197	2	0.25
A0R234	1	0.25
A0R295	1	0.25
A0R2H7	2	0.25
A0R2U7	3	0.25
A0R3C6	1	0.25
A0R3H8	1	0.25
A0R3L9	3	0.25
A0R411	1	0.25
A0R416	1	0.25
A0R421	2	0.25
A0R447	1	0.25
A0R461	3	0.25
A0R4H2	1	0.25
A0R515	1	0.25
A0R678	5	0.25
A0R6B0	1	0.25
A0QX20	10	0.243902
A0QV14	6	0.24
A0R618	5	0.238095
A0QQX8	4	0.235294
A0QSZ6	4	0.235294
A0QUA6	4	0.235294
A0QYE7	4	0.235294
A0R072	8	0.235294
A0QSD5	3	0.230769
A0R5G1	6	0.230769
A0QQX7	3	0.230769
A0QUM6	3	0.230769
A0R037	3	0.230769
A0QWW3	4	0.222222
A0R3D3	2	0.222222
A0R5C5	2	0.222222
A0QNN0	4	0.222222
A0QR08	2	0.222222
A0QT98	2	0.222222
A0R059	2	0.222222
A0R2Q7	4	0.222222
A0R3Y1	2	0.222222
A0R3Y5	2	0.222222
A0R4J1	2	0.222222
A0R587	2	0.222222
A0R6D7	2	0.222222
A0R716	2	0.222222
A0R574	11	0.215686
A0R465	10	0.212766
A0QS62	4	0.210526
A0R3M4	5	0.208333
A0QYY6	6	0.206897
A0QQZ3	1	0.2
A0QRN3	3	0.2
A0QS45	3	0.2
A0QSD7	3	0.2
A0QSG7	1	0.2
A0QTP3	1	0.2
A0QWQ9	2	0.2
A0QZA1	1	0.2
A0R1W8	1	0.2
A0R3C7	2	0.2
A0QP06	5	0.2
A0QPD1	1	0.2
A0QQU1	1	0.2
A0QR69	1	0.2
A0QR89	5	0.2
A0QRN4	1	0.2
A0QSA6	1	0.2
A0QSN8	1	0.2
A0QSV0	2	0.2
A0QT08	4	0.2
A0QT17	1	0.2
A0QTE6	1	0.2
A0QTG6	1	0.2
A0QTR3	1	0.2
A0QV03	1	0.2
A0QV77	1	0.2
A0QVF2	1	0.2
A0QVY9	1	0.2
A0QWG1	1	0.2
A0QWX7	2	0.2
A0QXB5	1	0.2
A0QXK4	1	0.2
A0QYR3	1	0.2
A0QZ36	2	0.2
A0QZ86	1	0.2
A0QZR7	1	0.2
A0R003	1	0.2
A0R185	1	0.2
A0R1A7	1	0.2
A0R1D1	1	0.2
A0R1E5	5	0.2
A0R1G3	1	0.2
A0R1H3	2	0.2
A0R2C6	2	0.2
A0R2H5	1	0.2
A0R2Y4	2	0.2
A0R407	1	0.2
A0R4B7	1	0.2
A0R4D6	1	0.2
A0R4I7	2	0.2
A0R560	1	0.2
A0R569	1	0.2
A0R5H3	1	0.2
A0R5R3	2	0.2
A0R5W6	1	0.2
A0R6A2	1	0.2
A0R6M5	3	0.2
A0R218	7	0.194444
A0QSN7	4	0.190476
A0QVM7	4	0.190476
A0R2V7	3	0.1875
A0QSF9	2	0.181818
A0QSG6	2	0.181818
A0QSS4	6	0.181818
A0QQH0	4	0.181818
A0QRB9	2	0.181818
A0QSJ1	2	0.181818
A0QT07	2	0.181818
A0QTA4	2	0.181818
A0QUH2	2	0.181818
A0QYF5	6	0.181818
A0QYT3	2	0.181818
A0R170	2	0.181818
A0R2P1	2	0.181818
A0R3Y0	2	0.181818
A0R479	2	0.181818
A0R202	5	0.178571
A0R155	5	0.178571
A0QVH9	3	0.176471
A0R5N8	3	0.176471
A0R3A6	5	0.172414
A0QS66	12	0.169014
A0QQK7	1	0.166667
A0QR33	1	0.166667
A0QU58	2	0.166667
A0QWX4	3	0.166667
A0R1Z0	1	0.166667
A0R638	2	0.166667
A0QNH8	1	0.166667
A0QNU4	1	0.166667
A0QPG2	1	0.166667
A0QPG6	1	0.166667
A0QQA2	1	0.166667
A0QR48	1	0.166667
A0QSJ0	2	0.166667
A0QSS0	1	0.166667
A0QUN1	1	0.166667
A0QUP0	1	0.166667
A0QVC7	1	0.166667
A0QVP0	1	0.166667
A0QVP8	1	0.166667
A0QVT5	1	0.166667
A0QW09	1	0.166667
A0QW11	1	0.166667
A0QX74	1	0.166667
A0QXN2	2	0.166667
A0QXP8	1	0.166667
A0QY59	1	0.166667
A0QYW6	1	0.166667
A0QZR5	1	0.166667
A0R0R9	4	0.166667
A0R175	1	0.166667
A0R178	1	0.166667
A0R1C3	6	0.166667
A0R2B7	2	0.166667
A0R2U8	3	0.166667
A0R3E7	1	0.166667
A0R4B3	2	0.166667
A0R4G4	3	0.166667
A0R4Z5	2	0.166667
A0R593	1	0.166667
A0R5H6	2	0.166667
A0R648	1	0.166667
A0R742	3	0.166667
A0R7J6	1	0.166667
A4ZHR8	5	0.16129
A0R616	4	0.16
A0QWT3	3	0.157895
A0R5R7	3	0.157895
A0R2X8	3	0.157895
A0QYZ2	5	0.15625
A0QZ49	2	0.153846
A0R033	2	0.153846
P60281	8	0.153846
A0QR03	2	0.153846
A0QYD5	2	0.153846
A0R342	2	0.153846
A0R4R9	2	0.153846
A0QNT5	3	0.15
A0R3L4	3	0.15
A0R6Q9	3	0.15
A0QWQ4	4	0.148148
A0QSE0	2	0.142857
A0QSP8	2	0.142857
A0QV10	1	0.142857
A0QV16	1	0.142857
A0QX87	1	0.142857
A0QZ40	1	0.142857
A0R2X1	1	0.142857
A0R3B8	2	0.142857
A0QNQ7	1	0.142857
A0QP11	3	0.142857
A0QQC1	1	0.142857
A0QRW8	3	0.142857
A0QSA8	1	0.142857
A0QSG5	1	0.142857
A0QSH9	1	0.142857
A0QSI8	1	0.142857
A0QT73	1	0.142857
A0QU06	1	0.142857
A0QUG7	1	0.142857
A0QUM5	1	0.142857
A0QVL7	1	0.142857
A0QWY3	1	0.142857
A0QY83	1	0.142857
A0QYQ4	1	0.142857
A0QYT4	1	0.142857
A0QZ93	1	0.142857
A0R095	1	0.142857
A0R157	1	0.142857
A0R1C8	1	0.142857
A0R248	1	0.142857
A0R2M2	1	0.142857
A0R3C9	1	0.142857
A0R3D9	1	0.142857
A0R4P1	1	0.142857
A0R577	2	0.142857
A0R6M1	1	0.142857
A0QVX6	3	0.136364
A0R199	3	0.136364
A0QSU3	3	0.136364
A0R069	3	0.136364
A0R1B3	3	0.136364
A0QP32	4	0.133333
A0QYS6	2	0.133333
A0QZ42	2	0.133333
A0R151	2	0.133333
A0R4M9	2	0.133333
A0QWR1	2	0.133333
A0QX32	2	0.133333
A0QYU8	2	0.133333
A0QZR0	2	0.133333
A0R0S7	2	0.133333
A0R181	2	0.133333
A0QNE0	6	0.12766
A0QQF4	1	0.125
A0QRD3	1	0.125
A0QS46	3	0.125
A0QZ47	1	0.125
A0R3N9	2	0.125
A0R6Q0	1	0.125
A0QQC9	1	0.125
A0QS40	1	0.125
A0QT14	1	0.125
A0QT69	1	0.125
A0QT71	1	0.125
A0QTE3	1	0.125
A0QTF2	1	0.125
A0QTH9	1	0.125
A0QTN3	1	0.125
A0QUZ5	1	0.125
A0QV28	1	0.125
A0QVI6	1	0.125
A0QVT1	1	0.125
A0QW43	1	0.125
A0QX37	1	0.125
A0QY16	1	0.125
A0QZ95	1	0.125
A0R094	1	0.125
A0R1E6	1	0.125
A0R1X2	1	0.125
A0R276	1	0.125
A0R3E2	2	0.125
A0R6K9	1	0.125
A0R730	1	0.125
A0R760	1	0.125
A0R7J0	1	0.125
A0R7H5	4	0.121212
A0QQH7	2	0.117647
A0QSD2	2	0.117647
A0QV37	2	0.117647
A0QTF4	2	0.117647
A0QUZ3	2	0.117647
A0R1D7	2	0.117647
A0R4H9	2	0.117647
A0QVL2	3	0.115385
A0QWG2	3	0.115385
A0R171	3	0.115385
A0QSL9	2	0.111111
A0QV20	1	0.111111
A0QZY9	1	0.111111
A0R200	2	0.111111
A0R4I0	1	0.111111
A0R5D9	6	0.111111
A0QQS3	1	0.111111
A0QR74	1	0.111111
A0QRB8	2	0.111111
A0QS42	1	0.111111
A0QTP6	1	0.111111
A0QTZ9	1	0.111111
A0QVR7	1	0.111111
A0QWG3	1	0.111111
A0QWQ1	1	0.111111
A0QWX8	2	0.111111
A0QX52	1	0.111111
A0QXZ2	1	0.111111
A0QYF2	1	0.111111
A0R0B6	2	0.111111
A0R0R8	1	0.111111
A0R1D5	1	0.111111
A0R1R5	1	0.111111
A0R2Q5	2	0.111111
A0R2T2	1	0.111111
A0R2V6	1	0.111111
A0R403	1	0.111111
A0R4Q1	2	0.111111
A0R4Y7	1	0.111111
A0R637	1	0.111111
A0R771	1	0.111111
A0R7J4	1	0.111111
A0R617	7	0.109375
A0QXX7	4	0.108108
A0QQK0	2	0.105263
A0QU54	2	0.105263
A0R1Y2	2	0.105263
A0QV42	1	0.1
A0QWN3	2	0.1
A0R1C2	4	0.1
A0R6E0	1	0.1
A0R7F7	1	0.1
A0QQ26	2	0.1
A0QST4	1	0.1
A0QT51	1	0.1
A0QTQ5	1	0.1
A0QTS3	1	0.1
A0QU01	1	0.1
A0QUH1	1	0.1
A0QUY6	1	0.1
A0QZQ9	1	0.1
A0R1H5	1	0.1
A0R214	1	0.1
A0R2P2	1	0.1
A0R4S0	1	0.1
A0R6Q7	1	0.1
P48354	3	0.0967742
A0QYQ7	2	0.0952381
A0QT01	2	0.0952381
A0QXC0	2	0.0952381
A0R3N8	2	0.0952381
A0R451	2	0.0952381
A0R7J7	2	0.0952381
A0QPF9	1	0.0909091
A0QRH1	1	0.0909091
A0QSL5	1	0.0909091
A0QYS9	1	0.0909091
A0R1V9	1	0.0909091
A0R201	1	0.0909091
A0R758	1	0.0909091
A0QR39	1	0.0909091
A0QTK6	1	0.0909091
A0QTL9	1	0.0909091
A0QV17	1	0.0909091
A0QVY3	1	0.0909091
A0QW31	1	0.0909091
A0QXC8	1	0.0909091
A0QYE8	1	0.0909091
A0QYT2	1	0.0909091
A0QZ26	1	0.0909091
A0QZ84	1	0.0909091
A0R143	1	0.0909091
A0R2T0	2	0.0909091
A0R4D8	1	0.0909091
A0R4I6	1	0.0909091
A0R4Q8	1	0.0909091
A0R6P9	1	0.0909091
A0QZ54	3	0.0882353
A0QW02	3	0.0882353
A0QSD4	2	0.0869565
A0R042	3	0.0857143
A0QSD3	1	0.0833333
A0QVT2	1	0.0833333
A0QYS5	1	0.0833333
P42829	1	0.0833333
A0QRV0	1	0.0833333
A0QSQ7	1	0.0833333
A0QZM1	1	0.0833333
A0QZX6	4	0.0833333
A0QZX9	1	0.0833333
A0R2D0	1	0.0833333
A0R2Q6	1	0.0833333
A0R2Y5	1	0.0833333
A0R3B7	1	0.0833333
A0R481	1	0.0833333
A0R4T0	1	0.0833333
A0R522	1	0.0833333
A0QSG4	1	0.0769231
A0R558	1	0.0769231
A0R692	1	0.0769231
P0CH37	1	0.0769231
A0QVL5	1	0.0769231
A0QVU2	1	0.0769231
A0QX90	1	0.0769231
A0R0B4	1	0.0769231
A0R524	1	0.0769231
A0R5B3	1	0.0769231
A0R5N7	1	0.0769231
A0R5Y0	1	0.0769231
A0QS30	1	0.0714286
A0QPV4	1	0.0714286
A0QR19	2	0.0714286
A0QU47	1	0.0714286
A0QU86	1	0.0714286
A0QUY9	1	0.0714286
A0QVX4	1	0.0714286
A0QYB1	1	0.0714286
A0R226	1	0.0714286
A0R298	1	0.0714286
A0R2H4	1	0.0714286
A0R3L2	2	0.0714286
A0R466	1	0.0714286
A0R4J6	1	0.0714286
A0R6V6	1	0.0714286
Q9ZHC5	3	0.0697674
A0R152	2	0.0689655
A0R2A4	2	0.0689655
A0R1H7	3	0.0681818
A0QNI9	1	0.0666667
A0QSD1	1	0.0666667
A0QSL6	1	0.0666667
A0QW19	1	0.0666667
A0R149	1	0.0666667
A0R220	1	0.0666667
A0R4S6	1	0.0666667
A0QNN8	1	0.0666667
A0QS44	1	0.0666667
A0QZI4	1	0.0666667
A0R189	1	0.0666667
A0R2E8	2	0.0666667
A0R3C8	1	0.0666667
A0R3P3	1	0.0666667
A0R5J4	1	0.0666667
A0QYG9	2	0.0645161
A0QS96	1	0.0625
A0R607	1	0.0625
A0R635	1	0.0625
A0QYB7	1	0.0625
A0R6D6	1	0.0625
A0R761	1	0.0625
P71533	3	0.0612245
A0QQB0	4	0.0588235
A0QR72	1	0.0588235
A0QS49	1	0.0588235
A0QTT0	1	0.0588235
A0QWJ3	1	0.0588235
A0QWS5	2	0.0588235
A0QY34	1	0.0588235
A0R1P4	1	0.0588235
A0R3E3	1	0.0588235
A0R4Q3	1	0.0588235
A0QVM0	1	0.0555556
A0QQ21	1	0.0555556
A0QV26	1	0.0555556
A0QVX3	1	0.0555556
A0R0Q9	1	0.0555556
A0R5H5	1	0.0555556
A0R609	2	0.0540541
A0R3D6	1	0.0526316
A0R3S7	2	0.0526316
A0R4C9	1	0.0526316
A0QTN2	1	0.0526316
A0QTW7	1	0.0526316
A0QUH4	1	0.0526316
A0QX46	2	0.0526316
A0QX62	1	0.0526316
A0R5T1	1	0.0526316
A0QQF0	2	0.0512821
A0QQK3	1	0.05
A0QUZ2	1	0.05
A0QXD8	1	0.05
A0QYB5	1	0.05
A0QNK2	1	0.05
A0QPN0	1	0.05
A0QRU9	1	0.05
A0QSG8	1	0.05
A0QXB2	1	0.05
A0QYM8	1	0.05
A0R663	1	0.05
A0QQX6	1	0.047619
A0QYT7	1	0.047619
A0R082	1	0.0454545
A0QUX6	1	0.0454545
A0R628	1	0.0434783
P0CH00	2	0.0434783
Q9RP48	1	0.0434783
A0QYX0	1	0.0434783
A0R511	1	0.0434783
A0R051	1	0.0416667
O52200	1	0.04
A0QQ65	1	0.04
A0QT43	1	0.04
A0R2J0	1	0.04
Q3L885	1	0.04
A0QPH5	1	0.0384615
A0QPJ3	1	0.0384615
A0R4S9	1	0.037037
A0QTT2	1	0.037037
A0QNT6	1	0.0357143
A0QUW7	1	0.0344828
A0QRY3	1	0.0344828
A0QV05	1	0.0344828
A0R5C0	1	0.0344828
A0QV25	1	0.03125
A0QNY8	1	0.030303
A0QNJ1	1	0.0294118
A0QW71	1	0.0294118
A0QWJ6	1	0.0294118
A0QV32	1	0.0277778
A0QYW4	1	0.0217391

## Sheet: succinylation
Table S4B. The modified lysine sites and ratio per protein in succinylome
Protein	succinylated lysine sites in protein	succinylated lysine sites / all lysine sites in protein
A0QSG3	7	1
A0QWH0	2	1
A0R219	1	1
A0QP38	4	1
A0QR09	2	1
A0QS89	2	1
A0QSM0	1	1
A0QT11	1	1
A0QV38	1	1
A0QW00	1	1
A0QWV8	2	1
A0QXL4	1	1
A0QYK3	1	1
A0QYS1	1	1
A0QZY3	2	1
A0R010	1	1
A0R0A1	1	1
A0R0S0	1	1
A0R110	2	1
A0R1B0	2	1
A0R2Q0	2	1
A0R482	2	1
A0R5N9	1	1
A0R7I0	1	1
A0QY23	16	0.888889
A0QQJ4	15	0.882353
A0QWW2	21	0.875
A0R006	6	0.857143
A0QVQ3	5	0.833333
O85501	5	0.833333
A0R5H1	5	0.833333
A0QQU5	33	0.825
A0QTA4	9	0.818182
A0QSD1	12	0.8
A0QZA1	4	0.8
A0R1W8	4	0.8
A0QRN4	4	0.8
A0QV03	4	0.8
A0R2V2	8	0.8
A0R2Y1	12	0.8
A0R462	4	0.8
A0R4K9	4	0.8
A0R7G8	4	0.8
A0QUV6	15	0.789474
A0QQC8	33	0.785714
A0QVE0	11	0.785714
A0QSG1	7	0.777778
A0QVQ8	13	0.764706
A0QSL4	3	0.75
A0QSS3	6	0.75
A0QSU4	6	0.75
A0R3N5	3	0.75
A0R5E1	3	0.75
A0QP20	3	0.75
A0QX15	6	0.75
A0R197	6	0.75
A0R2J4	3	0.75
A0R7J0	6	0.75
A0QSD7	11	0.733333
A0QSL8	11	0.733333
A0QR00	11	0.733333
A0QS97	8	0.727273
A0QSF9	8	0.727273
A0R102	8	0.727273
A0QRM0	13	0.722222
A0QX95	5	0.714286
P71534	5	0.714286
A0QTP1	5	0.714286
A0R0B0	19	0.703704
A0R1H3	7	0.7
A0QYD5	9	0.692308
A0R221	9	0.692308
A0R203	11	0.6875
A0QS62	13	0.684211
A0QS98	14	0.666667
A0QSD9	2	0.666667
A0QTK2	6	0.666667
A0QVB8	12	0.666667
A0QVB9	16	0.666667
A0QWT1	2	0.666667
A0R048	4	0.666667
A0R2K7	2	0.666667
A0R5Z0	2	0.666667
A0R7F9	4	0.666667
A0QP08	2	0.666667
A0QQP7	2	0.666667
A0QS41	4	0.666667
A0QT52	2	0.666667
A0QTF3	2	0.666667
A0QTR2	2	0.666667
A0QVB6	2	0.666667
A0QWW4	8	0.666667
A0QX24	8	0.666667
A0QX97	2	0.666667
A0QYU8	10	0.666667
A0QZ83	6	0.666667
A0QZA6	2	0.666667
A0QZB3	8	0.666667
A0R031	2	0.666667
A0R175	4	0.666667
A0R1X3	2	0.666667
A0R2Q7	12	0.666667
A0R2V4	2	0.666667
A0R3Y1	6	0.666667
A0R3Y5	6	0.666667
A0R478	6	0.666667
A0R4D5	2	0.666667
A0R5B1	2	0.666667
A0R5M3	12	0.666667
A0R6C7	2	0.666667
A0R7J6	4	0.666667
A0QX20	27	0.658537
A0R3M3	15	0.652174
A0QSD2	11	0.647059
A0R5N8	11	0.647059
A0QSE0	9	0.642857
A0QS63	9	0.642857
A0QSK7	9	0.642857
A0R629	9	0.642857
A0QSL7	7	0.636364
A0QUX8	14	0.636364
A0QPE6	7	0.636364
A0QTK6	7	0.636364
A0QWS8	7	0.636364
A0R2P1	7	0.636364
A0QQW8	19	0.633333
A0QUX1	12	0.631579
A0QS46	15	0.625
Q50441	5	0.625
A0R088	5	0.625
A0R2H8	10	0.625
A0R421	5	0.625
A0R6D6	10	0.625
A0QVU2	8	0.615385
A0R067	8	0.615385
A0QWW3	11	0.611111
A0R2U8	11	0.611111
A0R2B1	35	0.603448
A0QNF5	3	0.6
A0QRN3	9	0.6
A0QSH8	6	0.6
A0QSL3	3	0.6
A0QTP3	3	0.6
A0R0B3	3	0.6
A0R664	3	0.6
A0QNM0	3	0.6
A0QQU1	3	0.6
A0QR69	3	0.6
A0QRN5	3	0.6
A0QTR6	3	0.6
A0QUN2	3	0.6
A0QVF2	3	0.6
A0QWH2	3	0.6
A0QXB5	3	0.6
A0QXZ5	3	0.6
A0QY89	3	0.6
A0R3Q0	6	0.6
A0R569	3	0.6
A0R597	6	0.6
A0R5I8	3	0.6
A0R5R3	6	0.6
A0R5S1	3	0.6
A0QPE8	10	0.588235
A0QND6	7	0.583333
A0R7F6	7	0.583333
A0QSB1	7	0.583333
A0QSX4	7	0.583333
A0R461	7	0.583333
A4ZHR8	18	0.580645
A0QWX9	11	0.578947
A0QS39	4	0.571429
A0QV16	4	0.571429
A0QZ40	4	0.571429
A0R3B8	8	0.571429
A0QNF6	4	0.571429
A0QQ62	4	0.571429
A0QSA8	4	0.571429
A0QUG7	4	0.571429
A0QUY3	4	0.571429
A0QX35	8	0.571429
A0QYQ4	4	0.571429
A0R0E9	4	0.571429
A0R2X3	4	0.571429
A0R3D9	4	0.571429
A0R656	4	0.571429
A0R729	4	0.571429
A0QVQ5	21	0.567568
A0QTE7	13	0.565217
A0QWY0	13	0.565217
A0QPE7	9	0.5625
A0QP06	14	0.56
A0QSZ3	33	0.559322
A0R1Y7	10	0.555556
A0QR08	5	0.555556
A0QT98	5	0.555556
A0QU52	5	0.555556
A0QUY2	10	0.555556
A0R059	5	0.555556
A0R218	20	0.555556
A0R4J1	5	0.555556
A0R716	5	0.555556
A0QSG6	6	0.545455
A0QSS4	18	0.545455
A0R2G5	6	0.545455
A0R652	6	0.545455
A0QYT3	6	0.545455
A0R170	6	0.545455
A0R3M4	13	0.541667
A0QSD5	7	0.538462
A0QUM6	7	0.538462
A0R090	7	0.538462
A0QS45	8	0.533333
A0QQH7	9	0.529412
A0QSZ6	9	0.529412
A0QYE7	9	0.529412
A0R5R7	10	0.526316
A0QSJ2	10	0.526316
A0QT50	10	0.526316
A0R2X8	10	0.526316
A0QYF7	11	0.52381
A0R417	11	0.52381
A0QSD4	12	0.521739
A0QTE1	15	0.517241
A0R574	26	0.509804
A0QQF4	4	0.5
A0QQK7	3	0.5
A0QSD0	4	0.5
A0QSG0	7	0.5
A0QSK5	1	0.5
A0QSL9	9	0.5
A0QUW9	1	0.5
A0QV42	5	0.5
A0QVM0	9	0.5
A0QYG2	2	0.5
A0QZ11	3	0.5
A0QZZ6	2	0.5
A0R025	3	0.5
A0R0T9	4	0.5
A0R150	3	0.5
A0R1B5	2	0.5
A0R2V7	8	0.5
A0R3C7	5	0.5
A0R638	6	0.5
A0R6E3	2	0.5
A0QP28	1	0.5
A0QP45	3	0.5
A0QQ19	1	0.5
A0QQC9	4	0.5
A0QQH6	1	0.5
A0QQQ1	3	0.5
A0QQZ2	1	0.5
A0QR40	1	0.5
A0QR65	2	0.5
A0QRA7	3	0.5
A0QRX0	1	0.5
A0QSI6	1	0.5
A0QSV0	5	0.5
A0QT87	1	0.5
A0QTA0	1	0.5
A0QTD8	2	0.5
A0QTE3	4	0.5
A0QTF2	4	0.5
A0QTG8	4	0.5
A0QTL8	2	0.5
A0QTQ4	1	0.5
A0QTW9	2	0.5
A0QU56	2	0.5
A0QUE1	3	0.5
A0QUM7	10	0.5
A0QV15	1	0.5
A0QV28	4	0.5
A0QVI8	2	0.5
A0QVM4	6	0.5
A0QVP8	3	0.5
A0QVR0	3	0.5
A0QVT5	3	0.5
A0QVX3	9	0.5
A0QW13	3	0.5
A0QW14	2	0.5
A0QW16	2	0.5
A0QWS9	1	0.5
A0QWV1	1	0.5
A0QWX6	3	0.5
A0QX21	2	0.5
A0QX25	2	0.5
A0QX34	1	0.5
A0QX84	2	0.5
A0QXA3	9	0.5
A0QXC6	2	0.5
A0QXP9	2	0.5
A0QXW6	2	0.5
A0QYU0	1	0.5
A0QYU3	1	0.5
A0QYW6	3	0.5
A0QZ29	1	0.5
A0QZ33	2	0.5
A0QZ50	1	0.5
A0QZ91	2	0.5
A0R096	2	0.5
A0R097	1	0.5
A0R0C8	2	0.5
A0R0I8	2	0.5
A0R0P4	4	0.5
A0R0R1	2	0.5
A0R0R9	12	0.5
A0R0S8	1	0.5
A0R100	1	0.5
A0R177	3	0.5
A0R188	1	0.5
A0R1E6	4	0.5
A0R2B3	1	0.5
A0R2H6	1	0.5
A0R2H7	4	0.5
A0R2I1	2	0.5
A0R2L2	1	0.5
A0R2S0	1	0.5
A0R358	1	0.5
A0R3B6	1	0.5
A0R3D2	3	0.5
A0R3F0	2	0.5
A0R3F1	1	0.5
A0R3H8	2	0.5
A0R3R3	1	0.5
A0R416	2	0.5
A0R4F7	1	0.5
A0R4G4	9	0.5
A0R4G7	1	0.5
A0R4H2	2	0.5
A0R4M8	1	0.5
A0R4Z5	6	0.5
A0R559	1	0.5
A0R5F8	1	0.5
A0R5Q8	1	0.5
A0R5Q9	1	0.5
A0R5V6	1	0.5
A0R5V8	1	0.5
A0R5V9	3	0.5
A0R5X0	1	0.5
A0R6B0	2	0.5
A0R6J3	2	0.5
A0R6M2	2	0.5
A0R700	1	0.5
A0R742	9	0.5
A0R7H4	1	0.5
A0R7J3	4	0.5
A0QXX7	18	0.486486
P48354	15	0.483871
A0QYY6	14	0.482759
A0QS66	34	0.478873
A0R079	11	0.478261
A0QSN7	10	0.47619
A0QWT3	9	0.473684
A0QU54	9	0.473684
A0QQX8	8	0.470588
A0QNE0	22	0.468085
A0R151	7	0.466667
A0R4S6	7	0.466667
A0QUV7	7	0.466667
A0QW03	7	0.466667
A0QX32	7	0.466667
A0R3C8	7	0.466667
A0QSG4	6	0.461538
A0R692	6	0.461538
P0CH37	6	0.461538
A0QNZ3	6	0.461538
A0QQS8	6	0.461538
A0R0B4	6	0.461538
A0R429	6	0.461538
A0QV51	11	0.458333
A0QX36	11	0.458333
A0QWU8	5	0.454545
A0R0B2	5	0.454545
A0R561	5	0.454545
A0QSJ1	5	0.454545
A0QSU3	10	0.454545
A0QT07	5	0.454545
A0QYH7	5	0.454545
A0QZ84	5	0.454545
A0R4I6	5	0.454545
A0QYB5	9	0.45
A0R3L4	9	0.45
A0R3A6	13	0.448276
A0QUX7	4	0.444444
A0R3D3	4	0.444444
Q9F868	4	0.444444
A0QNN0	8	0.444444
A0QQ22	12	0.444444
A0QQS3	4	0.444444
A0QQV4	12	0.444444
A0QT20	4	0.444444
A0QWX8	8	0.444444
A0QZZ9	4	0.444444
A0R1C3	16	0.444444
A0R1D5	4	0.444444
A0R4S8	4	0.444444
A0R587	4	0.444444
A0R6K8	4	0.444444
A0QQ65	11	0.44
A0QR89	11	0.44
A0R1H7	19	0.431818
A0QSK6	3	0.428571
A0QSP8	6	0.428571
A0QX82	3	0.428571
A0R202	12	0.428571
A0R204	3	0.428571
A0R2X1	3	0.428571
A0QP11	9	0.428571
A0QPP0	3	0.428571
A0QPW2	3	0.428571
A0QQC1	3	0.428571
A0QRI9	3	0.428571
A0QSG5	3	0.428571
A0QSH9	3	0.428571
A0QU06	3	0.428571
A0QUM5	3	0.428571
A0QYI9	3	0.428571
A0QZ93	3	0.428571
A0QZ99	3	0.428571
A0R095	3	0.428571
A0R0B7	6	0.428571
A0R157	3	0.428571
A0R190	3	0.428571
A0R1Y5	3	0.428571
A0R512	3	0.428571
A0R724	3	0.428571
A0R7H2	3	0.428571
A0R5G1	11	0.423077
P60281	22	0.423077
A0QSK9	8	0.421053
A0R1Y2	8	0.421053
A0QYG9	13	0.419355
A0QSD3	5	0.416667
A0QSJ0	5	0.416667
A0R051	10	0.416667
A0R2B7	5	0.416667
A0R2Q6	5	0.416667
A0R2Y5	5	0.416667
A0R3L9	5	0.416667
A0QUA6	7	0.411765
A0QXB0	7	0.411765
A0QWQ4	11	0.407407
A0R465	19	0.404255
A0QQZ3	2	0.4
A0QSY5	4	0.4
A0QTF8	2	0.4
A0QWR4	4	0.4
A0QYS6	6	0.4
A0QZ42	6	0.4
A0R2E2	2	0.4
A0R3I9	2	0.4
A0R7F7	4	0.4
A0QNP8	2	0.4
A0QNS4	2	0.4
A0QP96	2	0.4
A0QPD1	2	0.4
A0QPD6	2	0.4
A0QQ63	2	0.4
A0QQC2	2	0.4
A0QR34	2	0.4
A0QRN7	4	0.4
A0QSG8	8	0.4
A0QSN8	2	0.4
A0QT08	8	0.4
A0QTG6	2	0.4
A0QTS3	4	0.4
A0QU01	4	0.4
A0QV77	2	0.4
A0QVZ3	2	0.4
A0QW27	2	0.4
A0QXB9	4	0.4
A0QXK4	2	0.4
A0QYG0	2	0.4
A0R003	2	0.4
A0R0B5	6	0.4
A0R185	2	0.4
A0R1A7	2	0.4
A0R1D1	2	0.4
A0R1G3	2	0.4
A0R238	2	0.4
A0R2W6	2	0.4
A0R3V7	2	0.4
A0R425	2	0.4
A0R4D6	2	0.4
A0R560	2	0.4
A0R5H3	2	0.4
A0R616	10	0.4
A0R659	6	0.4
A0R6M5	6	0.4
A0R7H5	13	0.393939
A0QYF5	13	0.393939
A0R200	7	0.388889
A0QWG2	10	0.384615
A0QZ49	5	0.384615
A0QUX0	5	0.384615
A0R342	5	0.384615
A0R618	8	0.380952
A0QX86	3	0.375
A0R215	3	0.375
A0R2Y2	3	0.375
A0R3N9	6	0.375
A0R6Q0	3	0.375
Q9RMN9	3	0.375
A0QPG3	3	0.375
A0QR04	3	0.375
A0QT04	6	0.375
A0QT14	3	0.375
A0QT69	3	0.375
A0QU00	3	0.375
A0QU07	3	0.375
A0QW43	3	0.375
A0QX37	3	0.375
A0QXU2	3	0.375
A0QZ95	3	0.375
A0QZ96	3	0.375
A0R0A8	3	0.375
A0R158	3	0.375
A0R1E4	3	0.375
A0R376	3	0.375
A0R761	6	0.375
A0QP32	11	0.366667
A0QPF9	4	0.363636
A0QSP9	4	0.363636
A0R201	4	0.363636
A0QRB9	4	0.363636
A0QX01	4	0.363636
A0R069	8	0.363636
A0R479	4	0.363636
A0R4D8	4	0.363636
A0QUY9	5	0.357143
A0R466	5	0.357143
A0QV37	6	0.352941
A0R072	12	0.352941
A0R1D7	6	0.352941
A0QWN3	7	0.35
A0QPN0	7	0.35
A0QVL2	9	0.346154
A0QNG6	1	0.333333
A0QNJ5	1	0.333333
A0QSD8	4	0.333333
A0QTE5	1	0.333333
A0QTU7	3	0.333333
A0QU81	1	0.333333
A0QV39	1	0.333333
A0QVT2	4	0.333333
A0QW25	2	0.333333
A0QWG8	4	0.333333
A0QWJ5	1	0.333333
A0QWX4	6	0.333333
A0QXE4	5	0.333333
A0QZ12	2	0.333333
A0QZX2	2	0.333333
A0R015	2	0.333333
A0R0W9	5	0.333333
A0R1H6	2	0.333333
A0R1Z0	2	0.333333
A0R220	5	0.333333
A0R3D7	1	0.333333
A0R420	2	0.333333
A0R4D2	1	0.333333
A0R4M9	5	0.333333
A0R580	2	0.333333
A0R5D9	18	0.333333
A0R5X8	2	0.333333
A0R647	1	0.333333
P42829	4	0.333333
Q9X5M0	5	0.333333
A0QNH8	2	0.333333
A0QNK8	1	0.333333
A0QNQ9	4	0.333333
A0QPG2	2	0.333333
A0QPL1	1	0.333333
A0QPL6	1	0.333333
A0QPN5	1	0.333333
A0QPS5	1	0.333333
A0QQ04	4	0.333333
A0QQA2	2	0.333333
A0QQF5	2	0.333333
A0QQF9	2	0.333333
A0QQH2	1	0.333333
A0QQL3	1	0.333333
A0QQQ4	1	0.333333
A0QQV2	1	0.333333
A0QQW0	1	0.333333
A0QQY0	5	0.333333
A0QR13	3	0.333333
A0QRB8	6	0.333333
A0QRV0	4	0.333333
A0QRW8	7	0.333333
A0QS44	5	0.333333
A0QSJ6	3	0.333333
A0QSS0	2	0.333333
A0QT01	7	0.333333
A0QT41	1	0.333333
A0QT42	7	0.333333
A0QTF5	1	0.333333
A0QTJ6	1	0.333333
A0QU64	1	0.333333
A0QUP0	2	0.333333
A0QUW8	1	0.333333
A0QV26	6	0.333333
A0QV36	1	0.333333
A0QV88	3	0.333333
A0QVC7	2	0.333333
A0QVM7	7	0.333333
A0QVQ2	2	0.333333
A0QVQ9	1	0.333333
A0QVR7	3	0.333333
A0QW06	1	0.333333
A0QW11	2	0.333333
A0QWP3	1	0.333333
A0QWS0	2	0.333333
A0QXN2	4	0.333333
A0QXP8	2	0.333333
A0QXX3	3	0.333333
A0QXZ3	1	0.333333
A0QY30	1	0.333333
A0QY90	1	0.333333
A0QYE3	1	0.333333
A0QYP5	1	0.333333
A0QZ09	1	0.333333
A0QZA4	3	0.333333
A0QZY1	1	0.333333
A0R061	1	0.333333
A0R073	2	0.333333
A0R0C7	5	0.333333
A0R0I1	1	0.333333
A0R0R8	3	0.333333
A0R0Z8	1	0.333333
A0R178	2	0.333333
A0R181	5	0.333333
A0R183	6	0.333333
A0R1C1	1	0.333333
A0R1H2	1	0.333333
A0R1X8	4	0.333333
A0R1Y8	2	0.333333
A0R268	1	0.333333
A0R292	3	0.333333
A0R2D0	4	0.333333
A0R2E3	1	0.333333
A0R2E8	10	0.333333
A0R2U7	4	0.333333
A0R2V1	1	0.333333
A0R2V6	3	0.333333
A0R338	1	0.333333
A0R348	1	0.333333
A0R3H0	1	0.333333
A0R3I4	1	0.333333
A0R3K9	1	0.333333
A0R3N8	7	0.333333
A0R3R4	1	0.333333
A0R3S3	3	0.333333
A0R409	1	0.333333
A0R446	1	0.333333
A0R452	1	0.333333
A0R463	1	0.333333
A0R467	1	0.333333
A0R469	1	0.333333
A0R4B3	4	0.333333
A0R4G8	1	0.333333
A0R4H1	1	0.333333
A0R4H3	1	0.333333
A0R4T0	4	0.333333
A0R5H6	4	0.333333
A0R5V7	1	0.333333
A0R6F1	1	0.333333
A0R6J2	1	0.333333
A0R6R0	1	0.333333
A0R771	3	0.333333
A0R772	1	0.333333
A0R7C9	1	0.333333
A0R7J4	3	0.333333
A0R1C2	13	0.325
A0R609	12	0.324324
A0QS52	9	0.321429
A0QVX6	7	0.318182
A0R199	7	0.318182
A0QSU5	7	0.318182
A0QUX6	7	0.318182
A0R042	11	0.314286
A0QWH1	5	0.3125
A0QTR5	5	0.3125
A0QYZ2	10	0.3125
A0R033	4	0.307692
A0QQF0	12	0.307692
A0QQX7	4	0.307692
A0QR03	4	0.307692
A0QX90	4	0.307692
A0R037	4	0.307692
A0R052	4	0.307692
A0R4R9	4	0.307692
A0R524	4	0.307692
A0R5Y0	4	0.307692
A0R066	3	0.3
A0QNT5	6	0.3
A0QQ26	6	0.3
A0QQI7	3	0.3
A0QQZ9	3	0.3
A0QT51	3	0.3
A0QTQ5	3	0.3
A0QUY6	3	0.3
A0QZ36	3	0.3
A0R1D8	3	0.3
A0R1H5	3	0.3
A0R2Y4	3	0.3
A0R3L1	3	0.3
A0R5I4	3	0.3
A0R678	6	0.3
A0R6Q7	3	0.3
A0R6S0	3	0.3
A0QP86	8	0.296296
A0QTT2	8	0.296296
A0QRQ9	5	0.294118
A0QSL1	5	0.294118
A0QTF4	5	0.294118
A0QVH9	5	0.294118
A0QW02	10	0.294118
A0QW71	10	0.294118
A0R588	10	0.294118
A0QND8	2	0.285714
A0QV10	2	0.285714
A0QX87	2	0.285714
A0R024	2	0.285714
A0R4Q0	6	0.285714
A0R579	2	0.285714
P71533	14	0.285714
A0QPM3	2	0.285714
A0QPV9	2	0.285714
A0QQZ5	2	0.285714
A0QR90	2	0.285714
A0QS91	2	0.285714
A0QSI8	2	0.285714
A0QSR5	4	0.285714
A0QSZ4	2	0.285714
A0QT96	2	0.285714
A0QVB2	2	0.285714
A0QVK4	2	0.285714
A0QVL7	2	0.285714
A0QWK7	4	0.285714
A0QWY3	2	0.285714
A0QX81	2	0.285714
A0QYB1	4	0.285714
A0QYT4	2	0.285714
A0R0P5	2	0.285714
A0R184	2	0.285714
A0R187	2	0.285714
A0R1C8	2	0.285714
A0R1D6	2	0.285714
A0R226	4	0.285714
A0R2F0	2	0.285714
A0R577	4	0.285714
A0R6Z9	2	0.285714
A0R7I9	2	0.285714
A0QV14	7	0.28
A0R2J0	7	0.28
A0QQW5	5	0.277778
A0R2Q5	5	0.277778
A0R5H5	5	0.277778
A0QUW7	8	0.275862
A0QRH1	3	0.272727
A0QSL5	3	0.272727
A0QVR3	3	0.272727
A0QYS9	3	0.272727
A0QYT0	3	0.272727
A0QYU6	3	0.272727
A0R082	6	0.272727
A0R1V9	3	0.272727
A0R4R3	6	0.272727
A0R4S7	3	0.272727
A0QRJ6	3	0.272727
A0QT22	3	0.272727
A0QUH2	3	0.272727
A0QV17	3	0.272727
A0QXC8	3	0.272727
A0QXI0	3	0.272727
A0QYE8	3	0.272727
A0QYT2	3	0.272727
A0R012	3	0.272727
A0R1B3	6	0.272727
A0R2T0	6	0.272727
A0R3Y0	3	0.272727
A0R5Y8	3	0.272727
A0R6P9	3	0.272727
A0QZX6	13	0.270833
A0QPJ3	7	0.269231
A0QSB9	4	0.266667
A0QSL6	4	0.266667
A0QNN8	4	0.266667
A0QUI9	4	0.266667
A0QWR1	4	0.266667
A0R0S7	4	0.266667
A0R3P4	4	0.266667
A0R617	17	0.265625
A0QZ54	9	0.264706
A0QTN2	5	0.263158
A0R628	6	0.26087
A0R7G6	6	0.26087
A0R511	6	0.26087
Q3I5Q7	6	0.26087
A0QRV8	7	0.259259
A0QNZ7	2	0.25
A0QQQ2	2	0.25
A0QRG0	1	0.25
A0QRN6	1	0.25
A0QS96	4	0.25
A0QSD6	3	0.25
A0QSQ1	1	0.25
A0QU58	3	0.25
A0QV09	1	0.25
A0QWT2	3	0.25
A0QX88	1	0.25
A0QXD8	5	0.25
A0QYS5	3	0.25
A0R0S4	3	0.25
A0R115	2	0.25
A0R2W9	2	0.25
A0R528	2	0.25
A0R5Z2	1	0.25
A0R635	4	0.25
A0R6D9	1	0.25
Q9X5M1	3	0.25
A0QND7	2	0.25
A0QRB6	1	0.25
A0QP21	1	0.25
A0QP49	1	0.25
A0QP93	4	0.25
A0QPG1	2	0.25
A0QPJ0	1	0.25
A0QPM2	1	0.25
A0QQ02	1	0.25
A0QQ23	2	0.25
A0QQ54	1	0.25
A0QQ56	3	0.25
A0QQ67	2	0.25
A0QQI4	1	0.25
A0QQI6	1	0.25
A0QQJ3	1	0.25
A0QQK8	1	0.25
A0QQS7	2	0.25
A0QQT1	1	0.25
A0QQU7	1	0.25
A0QQU9	1	0.25
A0QR20	1	0.25
A0QR24	1	0.25
A0QR76	1	0.25
A0QRA5	1	0.25
A0QRA9	1	0.25
A0QRU5	2	0.25
A0QS40	2	0.25
A0QS54	1	0.25
A0QSM5	1	0.25
A0QSQ8	3	0.25
A0QSU0	1	0.25
A0QT02	2	0.25
A0QT05	1	0.25
A0QT10	1	0.25
A0QT18	1	0.25
A0QT68	1	0.25
A0QTS8	3	0.25
A0QTX2	3	0.25
A0QU11	1	0.25
A0QU45	1	0.25
A0QU87	1	0.25
A0QUN9	2	0.25
A0QUZ5	2	0.25
A0QV18	2	0.25
A0QV33	1	0.25
A0QVD7	1	0.25
A0QVL6	1	0.25
A0QVT1	2	0.25
A0QVU5	1	0.25
A0QWD3	1	0.25
A0QWF0	1	0.25
A0QWG9	1	0.25
A0QWL9	1	0.25
A0QWQ7	1	0.25
A0QWU3	1	0.25
A0QXD0	1	0.25
A0QY09	1	0.25
A0QY31	2	0.25
A0QY48	2	0.25
A0QYA9	2	0.25
A0QYD3	2	0.25
A0QYD4	1	0.25
A0QYH0	4	0.25
A0QYQ6	1	0.25
A0QYQ9	1	0.25
A0QYU2	1	0.25
A0QZ31	1	0.25
A0QZA3	1	0.25
A0QZB0	1	0.25
A0QZL9	1	0.25
A0QZM1	3	0.25
A0QZM2	1	0.25
A0QZR9	1	0.25
A0QZY4	1	0.25
A0R039	1	0.25
A0R057	4	0.25
A0R0B1	1	0.25
A0R0N9	1	0.25
A0R0T7	1	0.25
A0R0Z3	1	0.25
A0R176	1	0.25
A0R234	1	0.25
A0R2I0	1	0.25
A0R2V8	2	0.25
A0R2Z2	1	0.25
A0R374	1	0.25
A0R3C6	1	0.25
A0R3H7	3	0.25
A0R3Q2	1	0.25
A0R3S0	1	0.25
A0R3U7	1	0.25
A0R3V8	1	0.25
A0R411	1	0.25
A0R447	1	0.25
A0R473	1	0.25
A0R477	1	0.25
A0R481	3	0.25
A0R4D7	1	0.25
A0R515	1	0.25
A0R5D3	1	0.25
A0R5K9	1	0.25
A0R5L0	3	0.25
A0R5U2	2	0.25
A0R5Y7	1	0.25
A0R5Y9	1	0.25
A0R679	3	0.25
A0R6E6	3	0.25
A0R6Q9	5	0.25
A0R730	2	0.25
A0R760	2	0.25
A0R7G7	2	0.25
Q2YHI6	1	0.25
A0R152	7	0.241379
A0R2A4	7	0.241379
A0R1E5	6	0.24
P0CH00	11	0.23913
A0QXC0	5	0.238095
A0R451	5	0.238095
A0QUY7	4	0.235294
A0QS49	4	0.235294
A0QSH0	4	0.235294
A0QSY1	4	0.235294
A0QT70	4	0.235294
A0R4H9	4	0.235294
A0QQK1	3	0.230769
A0R083	3	0.230769
A0R558	3	0.230769
A0QTL1	3	0.230769
A0QV52	3	0.230769
A0QV60	3	0.230769
A0QVJ2	3	0.230769
A0QXE2	3	0.230769
A0QYD6	6	0.230769
A0R2P0	3	0.230769
A0R5N7	3	0.230769
A0R623	3	0.230769
A0QQH0	5	0.227273
A0R085	5	0.227273
A0QTG2	2	0.222222
A0QV20	2	0.222222
A0R3C4	2	0.222222
A0R4I0	2	0.222222
A0R5C5	2	0.222222
A0QQ61	2	0.222222
A0QR74	2	0.222222
A0QS42	2	0.222222
A0QTP6	2	0.222222
A0QUH3	2	0.222222
A0QUM3	4	0.222222
A0QVZ7	2	0.222222
A0QWQ1	2	0.222222
A0QX60	2	0.222222
A0QXF3	4	0.222222
A0QYF2	2	0.222222
A0R0Q9	4	0.222222
A0R2Q4	2	0.222222
A0R2T2	2	0.222222
A0R403	2	0.222222
A0R4B8	2	0.222222
A0R5R6	2	0.222222
A0R637	2	0.222222
A0R6D7	2	0.222222
A0QPV4	3	0.214286
A0QV89	3	0.214286
A0R0F4	3	0.214286
A0R155	6	0.214286
A0R298	3	0.214286
A0R2H4	3	0.214286
A0R634	3	0.214286
A0R6V6	3	0.214286
A0QNG1	4	0.210526
A0R3D6	4	0.210526
A0R4C9	4	0.210526
A0QTW7	4	0.210526
A0R058	4	0.210526
A0R5T1	4	0.210526
A0QV05	6	0.206897
A0R3C5	7	0.205882
A0QQ98	1	0.2
A0QQZ8	1	0.2
A0QRJ0	1	0.2
A0QSG7	1	0.2
A0QTK3	2	0.2
A0QU51	1	0.2
A0QWQ9	2	0.2
A0QWU2	1	0.2
A0R6E0	2	0.2
A0R7J5	1	0.2
A0QNN6	2	0.2
A0QNQ4	2	0.2
A0QNT3	1	0.2
A0QNY6	1	0.2
A0QP01	1	0.2
A0QQ18	1	0.2
A0QQ58	1	0.2
A0QQJ6	1	0.2
A0QR68	1	0.2
A0QRA6	1	0.2
A0QRG4	2	0.2
A0QRH6	1	0.2
A0QS34	2	0.2
A0QS81	2	0.2
A0QSL0	2	0.2
A0QST4	2	0.2
A0QT17	1	0.2
A0QT43	5	0.2
A0QT46	1	0.2
A0QT90	1	0.2
A0QTC1	1	0.2
A0QTE6	1	0.2
A0QTR3	1	0.2
A0QTY3	1	0.2
A0QUD0	1	0.2
A0QUE0	3	0.2
A0QUH1	2	0.2
A0QV23	1	0.2
A0QV45	1	0.2
A0QVE7	1	0.2
A0QVJ1	1	0.2
A0QVJ6	2	0.2
A0QVK2	1	0.2
A0QVL3	1	0.2
A0QVP7	1	0.2
A0QVT8	1	0.2
A0QVY9	1	0.2
A0QVZ8	1	0.2
A0QW36	1	0.2
A0QWR8	2	0.2
A0QWX7	2	0.2
A0QX31	1	0.2
A0QX85	1	0.2
A0QX96	2	0.2
A0QXH9	1	0.2
A0QY10	1	0.2
A0QY21	1	0.2
A0QY73	1	0.2
A0QY79	1	0.2
A0QYC8	1	0.2
A0QYJ4	1	0.2
A0QYR0	1	0.2
A0QYR3	1	0.2
A0QZ58	1	0.2
A0QZ80	1	0.2
A0QZ85	1	0.2
A0QZ98	1	0.2
A0QZC4	3	0.2
A0QZH0	1	0.2
A0QZQ8	2	0.2
A0R173	1	0.2
A0R189	3	0.2
A0R1U8	1	0.2
A0R1W7	1	0.2
A0R214	2	0.2
A0R281	1	0.2
A0R283	1	0.2
A0R2C0	3	0.2
A0R2C6	2	0.2
A0R2E9	1	0.2
A0R2H5	1	0.2
A0R2P2	2	0.2
A0R2U5	2	0.2
A0R2U6	1	0.2
A0R2V3	1	0.2
A0R311	1	0.2
A0R3F5	1	0.2
A0R407	1	0.2
A0R4B7	1	0.2
A0R4I7	2	0.2
A0R4M3	1	0.2
A0R595	1	0.2
A0R5B5	1	0.2
A0R5F5	2	0.2
A0R5J4	3	0.2
A0R5W6	1	0.2
A0R676	2	0.2
A0R696	2	0.2
A0R6A2	1	0.2
A0R708	1	0.2
A0R769	1	0.2
A0R770	1	0.2
A0R7J2	1	0.2
A0QPH5	5	0.192308
A0R171	5	0.192308
A0R1C6	5	0.192308
A0QYQ7	4	0.190476
A0QU53	4	0.190476
A0R607	3	0.1875
A0QQD0	3	0.1875
A0QWJ0	3	0.1875
A0QWV0	3	0.1875
A0QYL9	6	0.1875
A0R3E2	3	0.1875
A0R4S9	5	0.185185
A0R191	2	0.181818
A0R758	2	0.181818
A0QNI4	2	0.181818
A0QQF8	2	0.181818
A0QR39	2	0.181818
A0QT33	2	0.181818
A0QTM2	2	0.181818
A0QV90	2	0.181818
A0QVY3	2	0.181818
A0QXE3	2	0.181818
A0QZ17	4	0.181818
A0QZ26	2	0.181818
A0R2B0	2	0.181818
A0R373	2	0.181818
A0R450	2	0.181818
A0R6G0	4	0.181818
A0R3L2	5	0.178571
A0QNK4	3	0.176471
A0QQB0	12	0.176471
A0QR91	3	0.176471
A0QS64	3	0.176471
A0QTQ8	3	0.176471
A0QTT0	3	0.176471
A0QUZ3	3	0.176471
A0QWS5	6	0.176471
A0R1P4	3	0.176471
A0R3E3	3	0.176471
A0QR33	1	0.166667
A0QRG5	1	0.166667
A0QXE5	1	0.166667
A0QZ46	1	0.166667
A0R043	1	0.166667
Q9AFI5	1	0.166667
A0QNG2	2	0.166667
A0QNP9	1	0.166667
A0QNU4	1	0.166667
A0QP46	1	0.166667
A0QP88	1	0.166667
A0QPG6	1	0.166667
A0QPW0	1	0.166667
A0QQI9	3	0.166667
A0QQL2	1	0.166667
A0QQN6	1	0.166667
A0QR48	1	0.166667
A0QRA0	1	0.166667
A0QRB4	3	0.166667
A0QT06	1	0.166667
A0QTP4	1	0.166667
A0QTS5	1	0.166667
A0QTY8	2	0.166667
A0QTZ3	1	0.166667
A0QUN1	1	0.166667
A0QUN5	1	0.166667
A0QUZ0	1	0.166667
A0QV46	1	0.166667
A0QVP0	1	0.166667
A0QW09	1	0.166667
A0QWE1	1	0.166667
A0QWU4	1	0.166667
A0QWZ9	4	0.166667
A0QX74	1	0.166667
A0QXC7	1	0.166667
A0QXD6	1	0.166667
A0QXT4	1	0.166667
A0QXV6	1	0.166667
A0QZ37	2	0.166667
A0QZR5	1	0.166667
A0QZV4	1	0.166667
A0QZX1	1	0.166667
A0QZX9	2	0.166667
A0R0B6	3	0.166667
A0R0S3	1	0.166667
A0R198	1	0.166667
A0R1A4	1	0.166667
A0R280	1	0.166667
A0R2N0	1	0.166667
A0R2R8	2	0.166667
A0R2T4	1	0.166667
A0R3B7	2	0.166667
A0R3D1	1	0.166667
A0R3E7	1	0.166667
A0R3S4	1	0.166667
A0R4H0	1	0.166667
A0R4J9	1	0.166667
A0R4K1	1	0.166667
A0R4Z1	1	0.166667
A0R530	1	0.166667
A0R593	1	0.166667
A0R5J6	1	0.166667
A0R5K0	1	0.166667
A0R5R5	3	0.166667
A0R5T8	2	0.166667
A0R5Z5	1	0.166667
A0R5Z9	1	0.166667
A0R648	1	0.166667
A0R6M7	1	0.166667
A0R6V7	2	0.166667
A0R773	3	0.166667
Q9ZHC5	7	0.162791
A0R3S7	6	0.157895
O68956	3	0.157895
A0QQK0	3	0.157895
A0QX46	6	0.157895
A0QYS4	3	0.157895
A0QV25	5	0.15625
A0QQ17	2	0.153846
A0QVL5	2	0.153846
A0R5J3	2	0.153846
A0R6L9	2	0.153846
A0R6N9	2	0.153846
A0R710	2	0.153846
A0QUZ2	3	0.15
A0QXB2	3	0.15
A0QWS1	1	0.142857
A0QX83	1	0.142857
A0QYB3	3	0.142857
A0R008	1	0.142857
A0QNQ7	1	0.142857
A0QP17	1	0.142857
A0QPN9	1	0.142857
A0QQA1	1	0.142857
A0QQN1	1	0.142857
A0QQV9	2	0.142857
A0QQY7	1	0.142857
A0QR11	1	0.142857
A0QR19	4	0.142857
A0QSJ5	1	0.142857
A0QSP5	1	0.142857
A0QT73	1	0.142857
A0QTL7	1	0.142857
A0QVC0	2	0.142857
A0QVC8	1	0.142857
A0QVH5	1	0.142857
A0QWS2	1	0.142857
A0QWZ3	1	0.142857
A0QX19	1	0.142857
A0QX92	1	0.142857
A0QY83	1	0.142857
A0QYF1	2	0.142857
A0R050	1	0.142857
A0R0E5	1	0.142857
A0R0Y9	5	0.142857
A0R1A6	1	0.142857
A0R1X6	1	0.142857
A0R1Z6	1	0.142857
A0R248	1	0.142857
A0R2M2	1	0.142857
A0R2M7	1	0.142857
A0R3C9	1	0.142857
A0R3H1	2	0.142857
A0R3I2	1	0.142857
A0R3Z5	3	0.142857
A0R408	1	0.142857
A0R4H6	1	0.142857
A0R4P1	1	0.142857
A0R4P7	1	0.142857
A0R4Z8	1	0.142857
A0R5Q0	1	0.142857
A0R5S6	1	0.142857
A0R6E5	1	0.142857
A0R6M1	1	0.142857
A0R6M8	1	0.142857
A0QV32	5	0.138889
A0QNI9	2	0.133333
A0QQG7	2	0.133333
A0QYF6	2	0.133333
A0QZR0	2	0.133333
A0R4Q2	4	0.133333
Q9RP48	3	0.130435
A0QYW4	6	0.130435
A0QYX0	3	0.130435
A0R2D2	3	0.130435
A0R196	4	0.129032
A0QRD3	1	0.125
A0QTG1	1	0.125
A0QVM3	1	0.125
A0QWH5	1	0.125
A0QWV9	1	0.125
A0QYU7	1	0.125
A0QZ47	1	0.125
A0R619	1	0.125
A0R757	1	0.125
I7FA35	2	0.125
A0QNT1	1	0.125
A0QQB1	1	0.125
A0QQB5	1	0.125
A0QQY1	1	0.125
A0QRD4	1	0.125
A0QS07	1	0.125
A0QSG9	1	0.125
A0QTH9	1	0.125
A0QTN3	1	0.125
A0QTZ8	1	0.125
A0QUW6	1	0.125
A0QV22	1	0.125
A0QVI6	1	0.125
A0QW34	1	0.125
A0QW60	1	0.125
A0QWF4	1	0.125
A0QWN4	1	0.125
A0QY16	1	0.125
A0R021	1	0.125
A0R094	1	0.125
A0R0Q5	1	0.125
A0R0Z0	1	0.125
A0R1D9	2	0.125
A0R1M3	1	0.125
A0R1X2	1	0.125
A0R2W7	1	0.125
A0R351	1	0.125
A0R3B5	1	0.125
A0R3R8	2	0.125
A0R441	1	0.125
A0R448	1	0.125
A0R4K5	2	0.125
A0R4M2	1	0.125
A0R5B2	1	0.125
A0R5L5	1	0.125
A0R5Z3	1	0.125
A0R603	1	0.125
A0R699	1	0.125
A0R6K9	1	0.125
A0R726	1	0.125
A0QNY8	4	0.121212
A0R665	3	0.12
O52200	3	0.12
A0QR46	2	0.117647
A0QTS9	2	0.117647
A0QUW5	2	0.117647
A0QW15	2	0.117647
A0QWJ3	2	0.117647
A0QYP9	2	0.117647
A0R2L4	2	0.117647
A0R506	2	0.117647
A0QSG2	1	0.111111
A0QUW3	1	0.111111
A0QYS8	1	0.111111
A0QZY9	1	0.111111
A0R016	1	0.111111
A0R112	1	0.111111
A0R610	1	0.111111
A0QNJ8	1	0.111111
A0QP53	1	0.111111
A0QQ21	2	0.111111
A0QQ30	1	0.111111
A0QQX4	1	0.111111
A0QRD5	1	0.111111
A0QRY7	1	0.111111
A0QRY8	1	0.111111
A0QT13	1	0.111111
A0QTZ9	1	0.111111
A0QU18	1	0.111111
A0QU43	1	0.111111
A0QU75	1	0.111111
A0QUV4	1	0.111111
A0QUV8	1	0.111111
A0QVQ0	1	0.111111
A0QVY4	2	0.111111
A0QVZ0	1	0.111111
A0QWG3	1	0.111111
A0QWI0	1	0.111111
A0QWP9	1	0.111111
A0QX00	1	0.111111
A0QX52	1	0.111111
A0QX80	1	0.111111
A0QXH6	1	0.111111
A0QXP3	1	0.111111
A0QXZ2	1	0.111111
A0QYT1	1	0.111111
A0QZM0	1	0.111111
A0R0T8	1	0.111111
A0R1B1	1	0.111111
A0R1R5	1	0.111111
A0R284	1	0.111111
A0R2B5	2	0.111111
A0R2I4	2	0.111111
A0R2S1	1	0.111111
A0R4Q1	2	0.111111
A0R4V6	1	0.111111
A0R4Y7	1	0.111111
A0R5E2	1	0.111111
A0R5G4	1	0.111111
A0R5U5	1	0.111111
A0R5Z8	1	0.111111
A0QNT6	3	0.107143
A0R091	2	0.105263
A0R5C4	2	0.105263
A0R5C0	3	0.103448
A0QVH7	1	0.1
A0R525	1	0.1
O52199	1	0.1
A0QNR6	1	0.1
A0QNT0	1	0.1
A0QRU9	2	0.1
A0QTI1	1	0.1
A0QTL0	1	0.1
A0QU62	1	0.1
A0QV73	1	0.1
A0QVP6	1	0.1
A0QX02	1	0.1
A0QXC3	1	0.1
A0QXH3	1	0.1
A0QXY9	1	0.1
A0QYR4	1	0.1
A0QZB5	1	0.1
A0QZC6	1	0.1
A0QZQ9	1	0.1
A0R045	1	0.1
A0R129	1	0.1
A0R2Z5	1	0.1
A0R404	1	0.1
A0R4S0	1	0.1
A0R5X9	1	0.1
A0R663	2	0.1
A0R6M0	1	0.1
A0QP34	2	0.0952381
A0QQX6	2	0.0952381
A0QRV6	2	0.0952381
A0QYN8	2	0.0952381
A0QYT7	2	0.0952381
A0R076	2	0.0952381
A0R5Q2	2	0.0952381
A0QS29	2	0.0909091
A0QWG6	1	0.0909091
A0R2E1	1	0.0909091
A0QPB3	1	0.0909091
A0QQ84	1	0.0909091
A0QRZ8	1	0.0909091
A0QSW3	1	0.0909091
A0QTC4	1	0.0909091
A0QTL9	1	0.0909091
A0QU61	1	0.0909091
A0QW31	1	0.0909091
A0QWX1	1	0.0909091
A0QYI2	1	0.0909091
A0QYQ1	1	0.0909091
A0QZ16	1	0.0909091
A0QZZ1	1	0.0909091
A0R143	1	0.0909091
A0R182	1	0.0909091
A0R1Q2	1	0.0909091
A0R2Z1	1	0.0909091
A0R2Z9	1	0.0909091
A0R3F3	1	0.0909091
A0R4K4	1	0.0909091
A0R4Q8	1	0.0909091
A0R523	1	0.0909091
A0R5D5	1	0.0909091
A0R5T5	1	0.0909091
A0R6R4	1	0.0909091
A0R7I3	1	0.0909091
A0QWJ6	3	0.0882353
A0QX93	1	0.0833333
A0QNJ7	1	0.0833333
A0QQB4	2	0.0833333
A0QQS5	1	0.0833333
A0QQW4	1	0.0833333
A0QQY2	1	0.0833333
A0QQZ4	1	0.0833333
A0QSH7	1	0.0833333
A0QSQ7	1	0.0833333
A0QUI8	1	0.0833333
A0QVF1	1	0.0833333
A0QWJ4	1	0.0833333
A0QWK5	1	0.0833333
A0R040	1	0.0833333
A0R260	1	0.0833333
A0R2B8	1	0.0833333
A0R3M2	1	0.0833333
A0R522	1	0.0833333
A0R5F9	1	0.0833333
A0QPD4	1	0.0769231
A0QQ05	1	0.0769231
A0QQM2	1	0.0769231
A0QRR4	1	0.0769231
A0QVL0	1	0.0769231
A0QVN3	1	0.0769231
A0QWQ6	1	0.0769231
A0QWU0	1	0.0769231
A0QWX3	1	0.0769231
A0QZ65	1	0.0769231
A0R1Q0	1	0.0769231
A0R5B3	1	0.0769231
A0QS30	1	0.0714286
A0QU63	1	0.0714286
A0QSX6	1	0.0714286
A0QU86	1	0.0714286
A0QUP3	1	0.0714286
A0QVX4	1	0.0714286
A0QWT6	1	0.0714286
A0QYZ7	1	0.0714286
A0R103	1	0.0714286
A0R1A5	1	0.0714286
A0R4J6	1	0.0714286
A0R6D2	1	0.0714286
A0R6L2	2	0.0689655
A0QW19	1	0.0666667
Q3L887	2	0.0666667
A0QNR4	1	0.0666667
A0QPX3	1	0.0666667
A0QQ59	1	0.0666667
A0QQA8	1	0.0666667
A0QQS4	1	0.0666667
A0QS72	1	0.0666667
A0QU12	1	0.0666667
A0QUX3	1	0.0666667
A0QWY8	1	0.0666667
A0QYH2	1	0.0666667
A0QZD1	1	0.0666667
A0R062	1	0.0666667
A0R193	2	0.0666667
A0R3P3	1	0.0666667
A0R4P4	1	0.0666667
A0R5C1	1	0.0666667
A0R5R4	1	0.0666667
A0QTT7	2	0.0645161
A0QYE0	1	0.0625
A0QNR3	1	0.0625
A0QP54	1	0.0625
A0QUC9	1	0.0625
A0QUJ1	1	0.0625
A0QVZ1	1	0.0625
A0QYB7	1	0.0625
A0R101	1	0.0625
A0R3Z4	1	0.0625
A0R426	1	0.0625
A0R4R1	1	0.0625
A0R5V1	1	0.0625
A0QPN1	2	0.0588235
A0QNJ1	2	0.0588235
A0QNL3	1	0.0588235
A0QP10	1	0.0588235
A0QR72	1	0.0588235
A0QTT6	1	0.0588235
A0QVJ3	1	0.0588235
A0QXF4	1	0.0588235
A0QY34	1	0.0588235
A0QYS3	1	0.0588235
A0R4Q3	1	0.0588235
A0R5G9	1	0.0588235
A0QNJ2	1	0.0555556
A0R4Y3	1	0.0555556
A0QPS9	1	0.0555556
A0QQ92	1	0.0555556
A0QRG9	1	0.0555556
A0QZX8	1	0.0555556
A0R2I2	1	0.0555556
A0R7I2	1	0.0555556
A0R7I5	1	0.0555556
A0R5T2	1	0.0526316
A0QNS8	1	0.0526316
A0QUH4	1	0.0526316
A0QX62	1	0.0526316
A0R1C7	1	0.0526316
A0R325	1	0.0526316
A0QQK3	1	0.05
A0R7K1	1	0.05
A0QNK2	1	0.05
A0QNT9	1	0.05
A0QNX7	2	0.05
Q3L891	1	0.05
A0R261	1	0.047619
A0R4Z2	1	0.047619
A0R6E9	1	0.047619
A0R7J7	1	0.047619
A0QWV6	1	0.0454545
A0R5I3	1	0.0454545
A0R5L3	1	0.0454545
A0R3Y2	1	0.0416667
A0QRF5	1	0.0416667
A0QPF6	1	0.04
A0QPF7	1	0.04
A0QSE5	1	0.04
A0QQ13	1	0.0384615
A0QRV5	2	0.037037
A0QX55	2	0.0338983
A0QPE5	1	0.03125
A0R2G2	1	0.0277778
A0QXA1	1	0.025

## Sheet: glutarylation
Table S4C. The modified lysine sites and ratio per protein in glutarylome
Protein	glutarylated lysine sites in protein	glutarylated lysine sites / all lysine sites in protein
A0R2Q0	2	1
A0QWH0	1	0.5
A0QSR9	1	0.5
A0R5F8	1	0.5
A0R006	3	0.428571
A0R1W8	2	0.4
A0QSS3	3	0.375
A0QWX6	2	0.333333
A0R4G8	1	0.333333
A0R5H1	2	0.333333
A0R5V9	2	0.333333
A0QS98	6	0.285714
A0QUX8	6	0.272727
A0QRN6	1	0.25
A0QSD0	2	0.25
A0R5E1	1	0.25
A0QP38	1	0.25
A0QTL8	1	0.25
A0QZ33	1	0.25
A0R2J4	1	0.25
A0QNZ3	3	0.230769
A0QVE0	3	0.214286
A0QWW2	5	0.208333
A0QQU5	8	0.2
A0QSH8	2	0.2
A0QWH2	1	0.2
A0QXZ5	1	0.2
A0R1A7	1	0.2
A0R462	1	0.2
A0R2G5	2	0.181818
A0R652	2	0.181818
A0QPE6	2	0.181818
A0QTE7	4	0.173913
A0QSZ3	10	0.169492
A0QVB9	4	0.166667
A0QZX2	1	0.166667
A0R048	1	0.166667
A0R7F9	1	0.166667
O85501	1	0.166667
A0QQW8	5	0.166667
A0QS41	1	0.166667
A0QUY2	3	0.166667
A0QZB3	2	0.166667
A0R177	1	0.166667
A0R178	1	0.166667
A0R648	1	0.166667
A0QUV6	3	0.157895
A0QQX7	2	0.153846
A0R067	2	0.153846
A0QSG0	2	0.142857
A0QSG3	1	0.142857
A0QX95	1	0.142857
A0R204	1	0.142857
A0QTP1	1	0.142857
A0QUG7	1	0.142857
A0QWZ8	1	0.142857
A0R2M2	1	0.142857
A0QUV7	2	0.133333
A0QWY0	3	0.130435
A0R3M3	3	0.130435
A0QRD3	1	0.125
A0QPE7	2	0.125
A0QT69	1	0.125
A0QTE3	1	0.125
A0QTF2	1	0.125
A0QR89	3	0.12
A0QUY7	2	0.117647
A0R5G1	3	0.115385
A0QRM0	2	0.111111
A0R5C5	1	0.111111
A0QU52	1	0.111111
A0QX52	1	0.111111
A0QXZ2	1	0.111111
A0QY23	2	0.111111
A0QZ83	1	0.111111
A0R059	1	0.111111
A0R4J1	1	0.111111
A0R5M3	2	0.111111
A0R6D7	1	0.111111
A0R202	3	0.107143
A0QV42	1	0.1
A0QWR4	1	0.1
A0QNW8	1	0.1
A0QST4	1	0.1
A0R1H3	1	0.1
A0R2C6	1	0.1
A0R2Y4	1	0.1
A0R4I7	1	0.1
A0QX20	4	0.097561
A0QQC8	4	0.0952381
A0R417	2	0.0952381
A0QS97	1	0.0909091
A0QSG6	1	0.0909091
A0QSS4	3	0.0909091
A0QVR3	1	0.0909091
A0QYS9	1	0.0909091
A0QRB9	1	0.0909091
A0QTK6	1	0.0909091
A0QUH2	1	0.0909091
A0QXC8	1	0.0909091
A0QYH7	1	0.0909091
A0R479	1	0.0909091
A0R4I6	1	0.0909091
A0QND6	1	0.0833333
A0QWT2	1	0.0833333
A0QSQ7	1	0.0833333
A0QSX4	1	0.0833333
A0R2U7	1	0.0833333
A0R3L9	1	0.0833333
A0R461	1	0.0833333
A0R4T0	1	0.0833333
A0QV69	1	0.0769231
A0QVU2	1	0.0769231
A0R221	1	0.0769231
A0R429	1	0.0769231
A0R4R9	1	0.0769231
A0QPV4	1	0.0714286
A0QS63	1	0.0714286
Q9ZHC5	3	0.0697674
A0QYY6	2	0.0689655
A0QSD7	1	0.0666667
Q9X5M0	1	0.0666667
A0QNN8	1	0.0666667
A0QQY0	1	0.0666667
A0QR00	1	0.0666667
A0QYU8	1	0.0666667
A0R2Y1	1	0.0666667
A0R3C8	1	0.0666667
A0R659	1	0.0666667
A0R2V7	1	0.0625
A0QWJ0	1	0.0625
A0R6D6	1	0.0625
A0QYF5	2	0.0606061
A0QQJ4	1	0.0588235
A0QSD2	1	0.0588235
A0QVH9	1	0.0588235
A0QYE7	1	0.0588235
A0R1D7	1	0.0588235
A0R5N8	1	0.0588235
A0QVB8	1	0.0555556
A0QWW3	1	0.0555556
A0QWX4	1	0.0555556
A0R1C3	2	0.0555556
A0R2Q5	1	0.0555556
A0R2U8	1	0.0555556
A0R742	1	0.0555556
A0QVQ5	2	0.0540541
A0QUX1	1	0.0526316
A0QWX9	1	0.0526316
A0QSK9	1	0.0526316
A0R2B1	3	0.0517241
A0QWN3	1	0.05
A0QNT5	1	0.05
A0R6Q9	1	0.05
A0R451	1	0.047619
A0R4Z2	1	0.047619
A0QRU3	1	0.0454545
A0R079	1	0.0434783
A0R3M4	1	0.0416667
A0QV51	1	0.0416667
A0QX36	1	0.0416667
A0R171	1	0.0384615
A0QTE1	1	0.0344828
A0QW02	1	0.0294118
A0R072	1	0.0294118
A0QS66	2	0.028169
A0R465	1	0.0212766
A0QZX6	1	0.0208333
A0R5D9	1	0.0185185
